# Supplementary material
Source: HighWire-hosted journal article supplement (https://jcp.bmj.com/content/jclinpath-2019-206235)

**Supplementary Figure, S3: Vaccine specific-IgG response assessment**

See text and supplementary S1 for details.

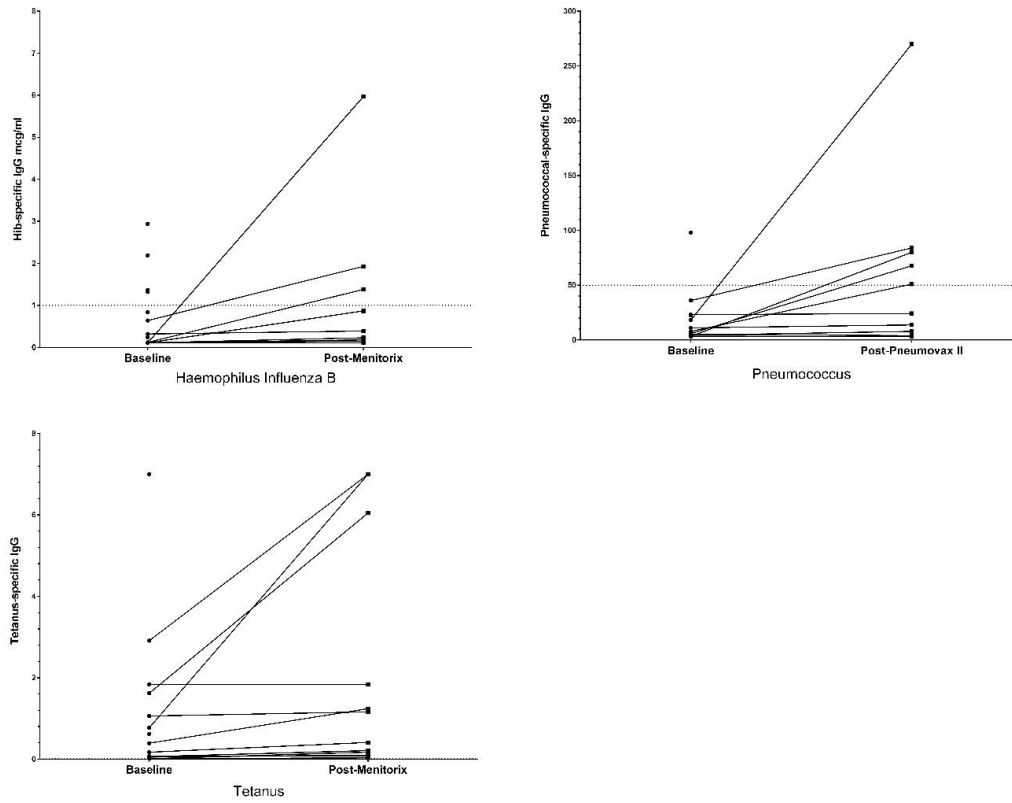

**Supplementary S4:** Decline in class-switched memory B-cell populations in individuals receiving clozapine is not readily explained by ageing.

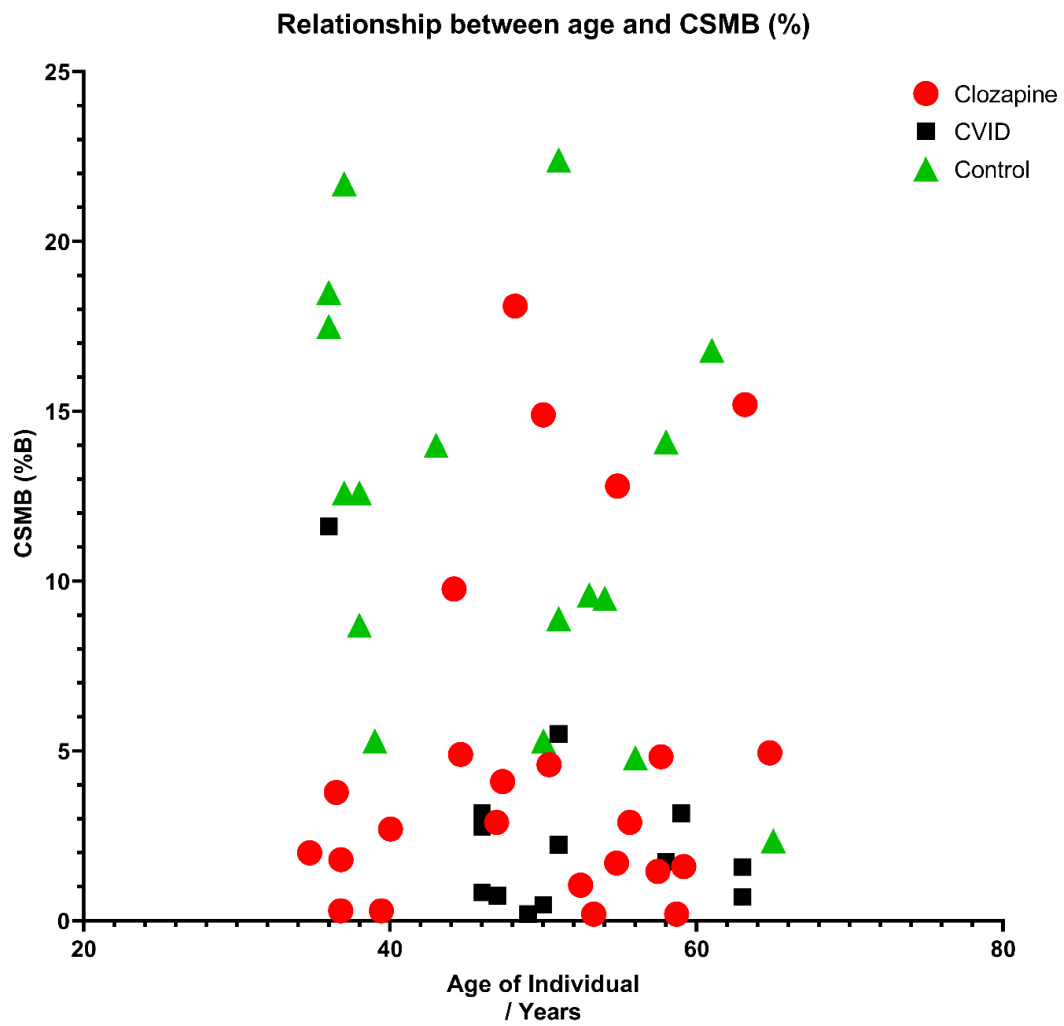

**Supplementary, S5: Cumulative Referrals to ICW with a diagnosis of schizophrenia in relation to introduction of calculated globulin screening.**

The national calculated globulin screening programme was setup during 2014, with roll-out complete across all health boards by November 2014. Consequently, any adult liver function test with low calculated globulin triggers the laboratory comment “*Low calculated globulin may represent antibody deficiency. Consider immunoglobulins if there is a history of infections*”.

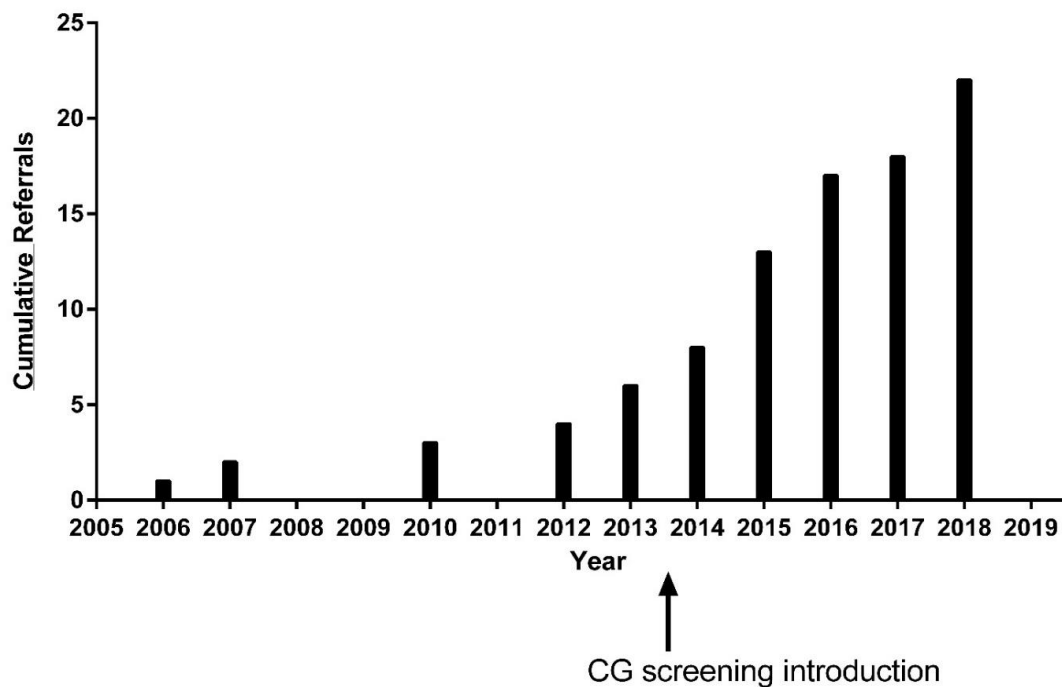

Supplement: inline-supplementary-material-3 [file inline-supplementary-material-3.pdf]
